# Supplementary material for: A Study of the Electronic Absorption and Emission Spectra of DBDMA Dye: Solvent Effect, Energy Transfer, and Fluorescence Quenching
Source: Hindawi journal article supplement (doi:10.1155/2023/7802548), 2023-01-01
Supplement: f1 [file 7802548.f1.docx]

**Supplementary material**

**Study of the electronic absorption and emission spectra of DBDMA dye: Solvent effect, Energy transfer and fluorescence quenching**

Sadeq M. Al-Hazmy1, Jameelah Al-Harby1, Mohammed Hassan2, Sabri Messaoudi1, Ibrahim A. Alhagri1,2, Ahmed N. Alhakimi1,2

1Department of Chemistry, College of Science, Qassim University, Buraidah 51452, Saudi Arabia

2Department of Chemistry, Faculty of Science, Ibb University, Ibb, Yemen.

Corresponding author: Mohammed Hassan (m-hassan@ibbuniv.edu.ye)

Fig. 1S Absorption spectra of 2.9 × 10-6M DBDMA in different solvents.

**Fig. 2S Fluorescence spectra of 1.4 × 10-6 mol dm-3 DBDMA in different solvents (λex at λab. Maxima).**

**Fig. 3S. Normalized absorption and fluorescence spectra of 1.4 × 10-5 mol dm-3 DBDMA in butanol, λex = 512 nm.**

**Fig. 4S. Normalized electronic absorption and excitation spectra of 1.41×10-5 M DBDMA in DMSO.**

**Fig. 5S a: Normalized Fluorescence spectra of 1.2 ×10-5 mol dm-3 DBDMA in CCl4 using different excitation wavelengths, the inset shows the unnormalized spectra.**

**Fig. 6S: Fluorescence decay profiles of DBDMA in DMF, Exponential fit, IRF, and Regular residual.**

**Fig. 7S: Emission spectra of 2.5 ×10-5 mol dm-3 DBDMA in ethanol: Fresh
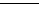
, aerated with O2 gas for 20 min
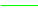
 and flushed with N2
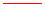
 for 20 mins at room temperature, λex = 539 nm .**

**Fig. 8S: Stern-Volmer plot of fluorescence quenching of DBDMA by Cu2+ in ethanol (λex = 514 nm).**

**Table 1S: Ligand coordinates optimized at PBEPBE1PBE/Lanl2DZ/6-31+G(d) :**

---------------------------------------------------------------------

Center Atomic Atomic Coordinates (Angstroms)

Number Number Type X Y Z

---------------------------------------------------------------------

1 6 0 0.023254 2.074250 -0.000199

2 6 0 0.043674 3.492135 -0.000454

3 7 0 0.049696 4.657165 -0.000656

4 6 0 1.250256 1.382274 -0.000098

5 6 0 2.497296 2.107615 -0.000264

6 6 0 2.521044 -0.608011 0.000111

7 1 0 2.455174 3.194688 -0.000432

8 6 0 2.636447 -2.010249 0.000283

9 6 0 3.702144 0.174821 -0.000081

10 6 0 3.888518 -2.593689 0.000270

11 1 0 1.751837 -2.630590 0.000415

12 6 0 4.963135 -0.447030 -0.000094

13 6 0 5.060814 -1.820840 0.000084

14 1 0 3.960016 -3.677699 0.000408

15 1 0 5.835600 0.198724 -0.000246

16 1 0 6.032990 -2.304221 0.000075

17 6 0 -1.237727 1.417616 -0.000151

18 6 0 -2.435215 2.194171 -0.000518

19 6 0 -2.533855 -0.584425 0.000148

20 6 0 -3.646353 1.584910 -0.000609

21 1 0 -2.343260 3.274058 -0.000760

22 6 0 -2.624452 -1.991928 0.000525

23 6 0 -3.737046 0.166928 -0.000283

24 1 0 -4.560327 2.173434 -0.000946

25 6 0 -3.859904 -2.606500 0.000447

26 1 0 -1.730730 -2.597306 0.000918

27 6 0 -4.983241 -0.490519 -0.000355

28 6 0 -5.051692 -1.864430 -0.000001

29 1 0 -3.903066 -3.691953 0.000755

30 1 0 -5.886488 0.114333 -0.000692

31 1 0 -6.012361 -2.370231 -0.000063

32 7 0 -1.302431 0.067928 0.000163

33 7 0 3.660412 1.545641 -0.000262

34 7 0 1.290007 0.037946 0.000103

35 5 0 -0.012701 -0.841602 0.000376

36 9 0 -0.015744 -1.616906 -1.143138

37 9 0 -0.015620 -1.616269 1.144326

**Table 2S: Cu complex with ethanol molecules coordinates optimized at PBEPBE1PBE/Lanl2DZ/6-31+G(d) :**

---------------------------------------------------------------------

Center Atomic Atomic Coordinates (Angstroms)

Number Number Type X Y Z

---------------------------------------------------------------------

1 6 0 1.378557 0.271419 0.316774

2 6 0 0.056535 0.674421 0.432271

3 6 0 1.617572 -1.136562 0.190074

4 6 0 0.527127 -2.059369 0.153417

5 6 0 3.085324 -2.955616 -0.044931

6 1 0 -0.492371 -1.684004 0.224569

7 6 0 4.377552 -3.508988 -0.149439

8 6 0 1.950801 -3.825041 -0.074940

9 6 0 4.516461 -4.873462 -0.278717

10 1 0 5.254146 -2.878105 -0.122091

11 6 0 2.130776 -5.215482 -0.209984

12 6 0 3.399240 -5.735196 -0.310678

13 1 0 5.514529 -5.293751 -0.356087

14 1 0 1.243579 -5.839683 -0.227588

15 1 0 3.547671 -6.805435 -0.413054

16 6 0 2.418956 1.271436 0.346695

17 6 0 2.082496 2.633398 0.531331

18 6 0 4.724855 1.824150 0.226759

19 6 0 3.066429 3.579741 0.564324

20 1 0 1.042282 2.906670 0.668519

21 6 0 6.075876 1.447460 0.066424

22 6 0 4.417896 3.206607 0.408210

23 1 0 2.819280 4.627085 0.715807

24 6 0 7.060871 2.409788 0.093955

25 1 0 6.351474 0.414298 -0.081413

26 6 0 5.454230 4.164867 0.433233

27 6 0 6.761686 3.774598 0.279325

28 1 0 8.094922 2.103393 -0.031304

29 1 0 5.195222 5.210053 0.576291

30 1 0 7.561836 4.507476 0.298381

31 7 0 3.699571 0.888252 0.210247

32 7 0 0.683707 -3.342939 0.021003

33 7 0 2.867225 -1.597418 0.082825

34 5 0 4.136031 -0.634068 0.052197

35 9 0 4.931239 -0.961992 1.114552

36 9 0 4.732835 -0.790111 -1.168700

37 29 0 -2.829682 0.979207 -0.332035

38 7 0 -1.069532 0.972529 0.594508

39 1 0 -3.952048 -1.990789 2.770834

40 1 0 -3.365543 -1.309157 0.661942

41 1 0 -5.168606 1.625752 -0.157740

42 1 0 -3.669632 3.339680 1.043056

43 1 0 -3.154973 2.533638 -2.432647

44 6 0 -5.727894 -1.533315 2.043441

45 1 0 -6.125238 -1.033091 2.935111

46 1 0 -6.037442 -0.954021 1.168786

47 6 0 -6.214084 -2.963190 1.961352

48 1 0 -7.308568 -2.988647 1.948420

49 1 0 -5.851895 -3.459606 1.055260

50 1 0 -5.887712 -3.545759 2.830979

51 6 0 -3.309933 -1.932394 -1.231286

52 1 0 -2.756346 -1.616296 -2.120994

53 1 0 -4.375832 -1.740533 -1.406848

54 6 0 -3.055654 -3.392935 -0.928246

55 1 0 -3.600725 -3.709639 -0.032569

56 1 0 -3.402141 -4.010427 -1.763756

57 1 0 -1.990096 -3.591054 -0.773470

58 6 0 -5.579379 1.138858 -2.059850

59 1 0 -5.121406 0.427057 -2.751486

60 1 0 -5.429155 2.153875 -2.455267

61 6 0 -7.051335 0.852967 -1.872980

62 1 0 -7.573809 0.947791 -2.830313

63 1 0 -7.207003 -0.162972 -1.497710

64 1 0 -7.511203 1.561479 -1.175063

65 6 0 -1.181148 2.626170 -2.525145

66 1 0 -0.404644 2.549518 -1.761643

67 1 0 -1.182785 3.654037 -2.902776

68 6 0 -0.980403 1.620566 -3.634373

69 1 0 -0.027864 1.807697 -4.140896

70 1 0 -0.962136 0.596168 -3.245510

71 1 0 -1.768857 1.693320 -4.392359

72 6 0 -3.959697 2.150456 2.594487

73 1 0 -3.994085 1.061781 2.682625

74 1 0 -4.907145 2.559552 2.963762

75 6 0 -2.782314 2.735461 3.338416

76 1 0 -2.745467 3.827049 3.234834

77 1 0 -2.872682 2.518372 4.407712

78 1 0 -1.839538 2.312456 2.978693

79 8 0 -4.292295 -1.432468 2.056072

80 8 0 -2.845760 -1.088034 -0.159409

81 8 0 -2.422087 2.414638 -1.810727

82 8 0 -4.852689 0.987139 -0.824383

83 8 0 -3.883320 2.402374 1.168793

---------------------------------------------------------------------
